# Supplementary material
Source: PubMed Central journal article supplement (PMC7322954)
Supplement: advancesADV2019001367-suppl1.pdf [file advancesADV2019001367-suppl1.pdf]

**Supplemental Table 1. Immune-mediated adverse events<sup>a</sup> and infusion reactions**

| n (%)              | Total population<br>N = 31 |                      |
|--------------------|----------------------------|----------------------|
|                    | Any grade                  | Grade 3 <sup>b</sup> |
| Any                | 14 (45)                    | 3 (10)               |
| Hypothyroidism     | 5 (16)                     | 0                    |
| Pneumonitis        | 4 (13)                     | 0                    |
| Colitis            | 2 (6)                      | 2 (6)                |
| Thyroiditis        | 2 (6)                      | 0                    |
| Hyperthyroidism    | 1 (3)                      | 0                    |
| Nephrotic syndrome | 1 (3)                      | 1 (3)                |
| Infusion reactions | 1 (3)                      | 0                    |

<sup>a</sup>Based on a list of terms specified by the sponsor and included by the investigator regardless of attribution to study treatment or immune relatedness; related terms included.

<sup>b</sup>There were no grade 4 or 5 immune-mediated adverse events.
